# Supplementary material
Source: Springer Nature journal article supplement (https://www.springermedizin.de/resource/supplementary/12885_2009_1866_MOESM2_ESM.pdf/9461376)

Wild type

AT<sub>2</sub>KO

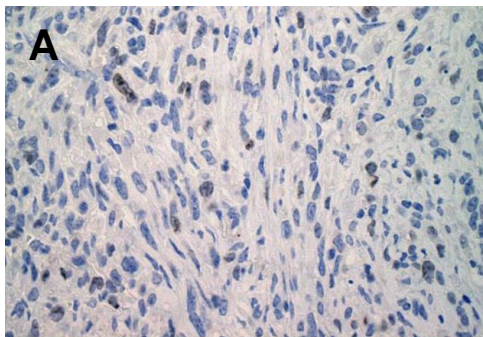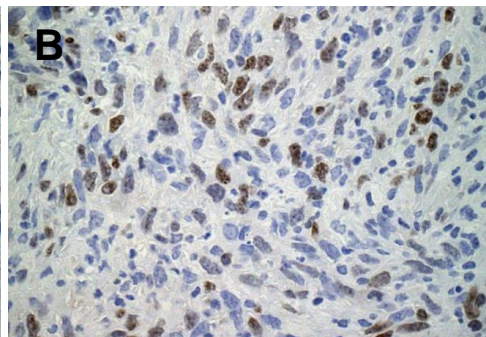

**C**

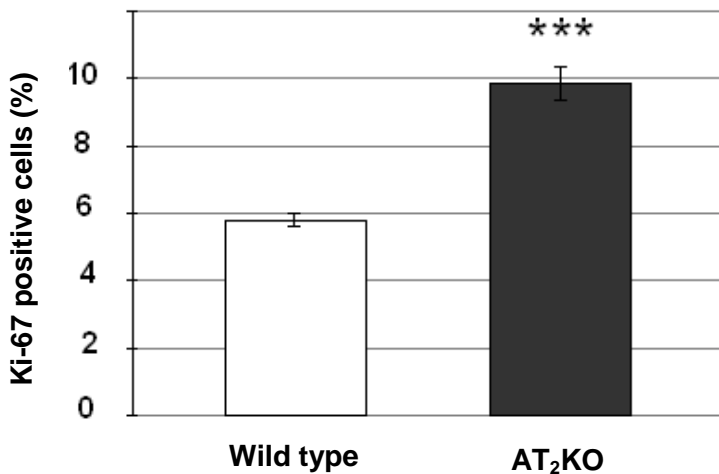

Supplement: MOESM2 [file 9461376]
